# Supplementary material for: Interactions of Coated-Gold Engineered Nanoparticles with Aquatic Higher Plant Salvinia minima Baker
Source: MDPI journal article supplement (doi:10.3390/nano11123178), 2021-11-24
Supplement: s1 [file s1]

# Interactions of Coated-Gold Engineered Nanoparticles with Aquatic Higher Plant *Salvinia minima* Baker

Ntombikayise Mahaye <sup>1</sup>, Melusi Thwala <sup>2</sup> and Ndeke Musee <sup>1,\*</sup>

<sup>1</sup> Emerging Contaminants Ecological and Risk Assessment (ECERA) Research Group, Department of Chemical Engineering, University of Pretoria, Pretoria, 0028, South Africa; mahaye.ntombi@gmail.com

<sup>2</sup> Water Centre, Council for Scientific and Industrial Research, Pretoria, 0184, South Africa; mthwala@csir.co.za

\* Correspondence: ndeke.musee@up.ac.za or musee2012@gmail.com

The  $\zeta$  potentials were calculated using Smoluchowski equation:

$$\nu E = 4\pi\epsilon_0\epsilon r + \frac{\zeta}{6\pi\mu} + (1 + \kappa r) \quad (\text{Eq. S1})$$

where  $\epsilon_0$  and  $\epsilon r$  are the relative dielectric constant and the electrical permittivity of a vacuum respectively,  $\mu$  is the solution viscosity,  $r$  is the particle radius and  $\kappa = (2n_0z^2e^2/\epsilon r\epsilon_0k_B T)^{1/2}$  is the Debye-Hückel parameter,  $n_0$  is the bulk ionic concentration,  $z$  is the valence of the ion,  $e$  is the charge of an electron,  $k_B$  is the Boltzmann constant, and  $T$  is the absolute temperature.

The ionic strength (IS) of the medium was calculated as follows:

$$\text{IS} = \frac{1}{2} \sum_i C_i Z_i^2 \quad (\text{Eq. S2})$$

where IS is the ionic strength in mM,  $C_i$  is the concentration of the  $i^{\text{th}}$  species in mM, and  $Z_i$  is the charge of the  $i^{\text{th}}$  species.

Table S1: Composition of Hoagland's medium

| Macronutrient                                                      | Per litre of nutrient solution |
|--------------------------------------------------------------------|--------------------------------|
| KNO <sub>3</sub>                                                   | 5 ml of 1 M                    |
| Ca(NO <sub>3</sub> ) <sub>2</sub> ·4H <sub>2</sub> O               | 5 ml of 1 M                    |
| MgSO <sub>4</sub> ·7(H <sub>2</sub> O)                             | 2 ml of 1 M                    |
| KH <sub>2</sub> PO <sub>4</sub>                                    | 2 ml of 1 M                    |
| Micronutrients                                                     | Per litre (g)                  |
| H <sub>3</sub> BO <sub>3</sub>                                     | 2.86                           |
| MnCl <sub>2</sub> ·4(H <sub>2</sub> O)                             | 1.81                           |
| ZnSO <sub>4</sub> ·7H <sub>2</sub> O                               | 0.22                           |
| CuSO <sub>4</sub> ·5H <sub>2</sub> O                               | 0.08                           |
| MoO <sub>3</sub>                                                   | 0.02                           |
| Fe-EDTA                                                            | 1-5 ml of 1000 mg/L            |
| Minus nitrogen                                                     | Per litre of nutrient solution |
| Ca(NO <sub>3</sub> ) <sub>2</sub> ·4H <sub>2</sub> O               | 0.75 ml of 1 M                 |
| Ca(H <sub>2</sub> PO <sub>4</sub> ) <sub>2</sub> ·H <sub>2</sub> O | 10 ml of 0.05 M                |
| CaSO <sub>4</sub> ·2H <sub>2</sub> O                               | 200 ml of 0.01 M               |
| K <sub>2</sub> SO <sub>4</sub>                                     | 5 ml of 0.5 M                  |
| MgSO <sub>4</sub> ·7H <sub>2</sub> O                               | 2 ml of 1 M                    |

Source: Hoagland and Arnon [1]

Table S2: Mean sizes (nm) of nAu obtained using TEM

| Sample         | Size (nm)<br>(Manufacturer) | Size (nm)<br>(Current study) |
|----------------|-----------------------------|------------------------------|
| 5 nm cit-nAu   | 4.8±0.7                     | 5.6±1.4                      |
| 20 nm cit-nAu  | 20.0±2.5                    | 20.7±2.5                     |
| 40 nm cit-nAu  | 39.9±4.1                    | 41.3±4.0                     |
| 5 nm BPEI-nAu  | 4.3±0.6                     | 5.0±0.6                      |
| 20 nm BPEI-nAu | 18.2±1.6                    | 19.0±2.7                     |
| 40 nm BPEI-nAu | 41.3±4.2                    | 41.3±2.8                     |

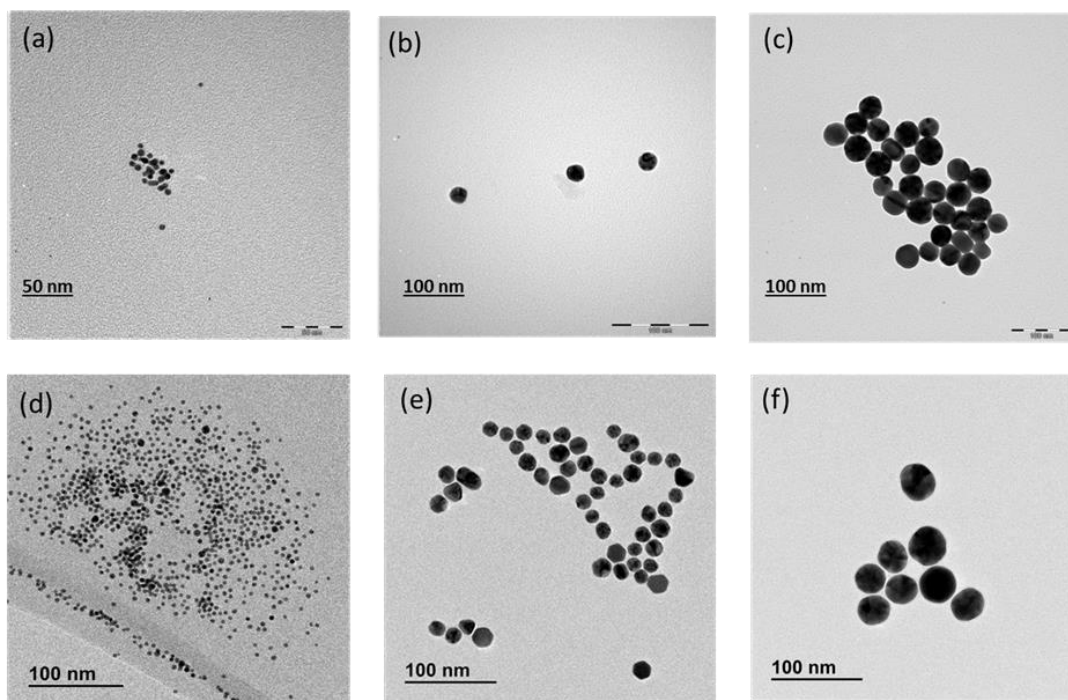

Figure S1. TEM images of nAu (a) 5 nm-Cit, (b) 20 nm-Cit, (c) 40 nm-Cit, (d) 5 nm-BPEI, (e) 20 nm-BPEI, (f) and 40 nm-BPEI. Source: Mahaye [2].

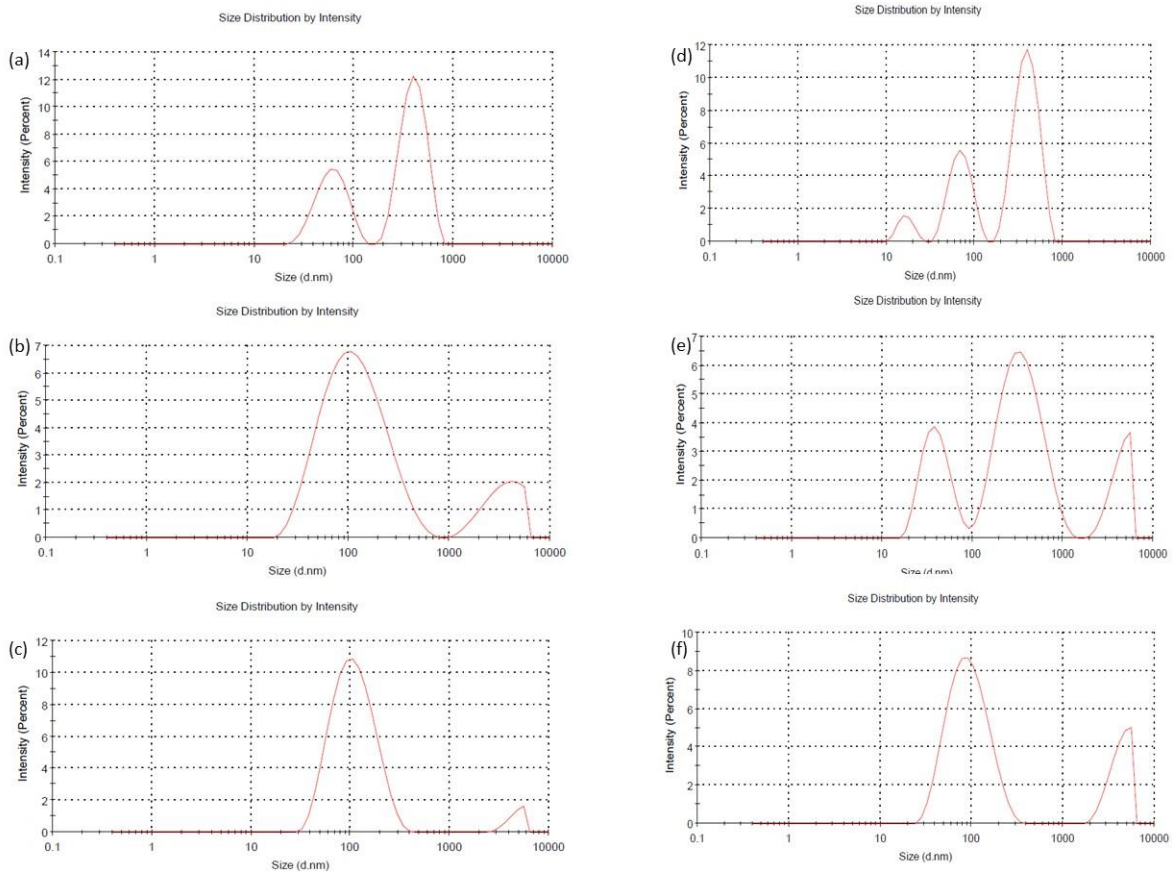

Figure S2: Particle size distribution of gold nanoparticles at 1000  $\mu\text{g/L}$  in 10% Hoagland's medium measured using Dynamic Light Scattering technique at 0 h (a) 5 nm Cit-nAu, (b) 20 nm Cit-nAu, (c) 40 nm Cit-nAu, (d) 5 nm BPEI-nAu, (e) 20 nm

BPEI-nAu, and (f) 40 nm BPEI-nAu.

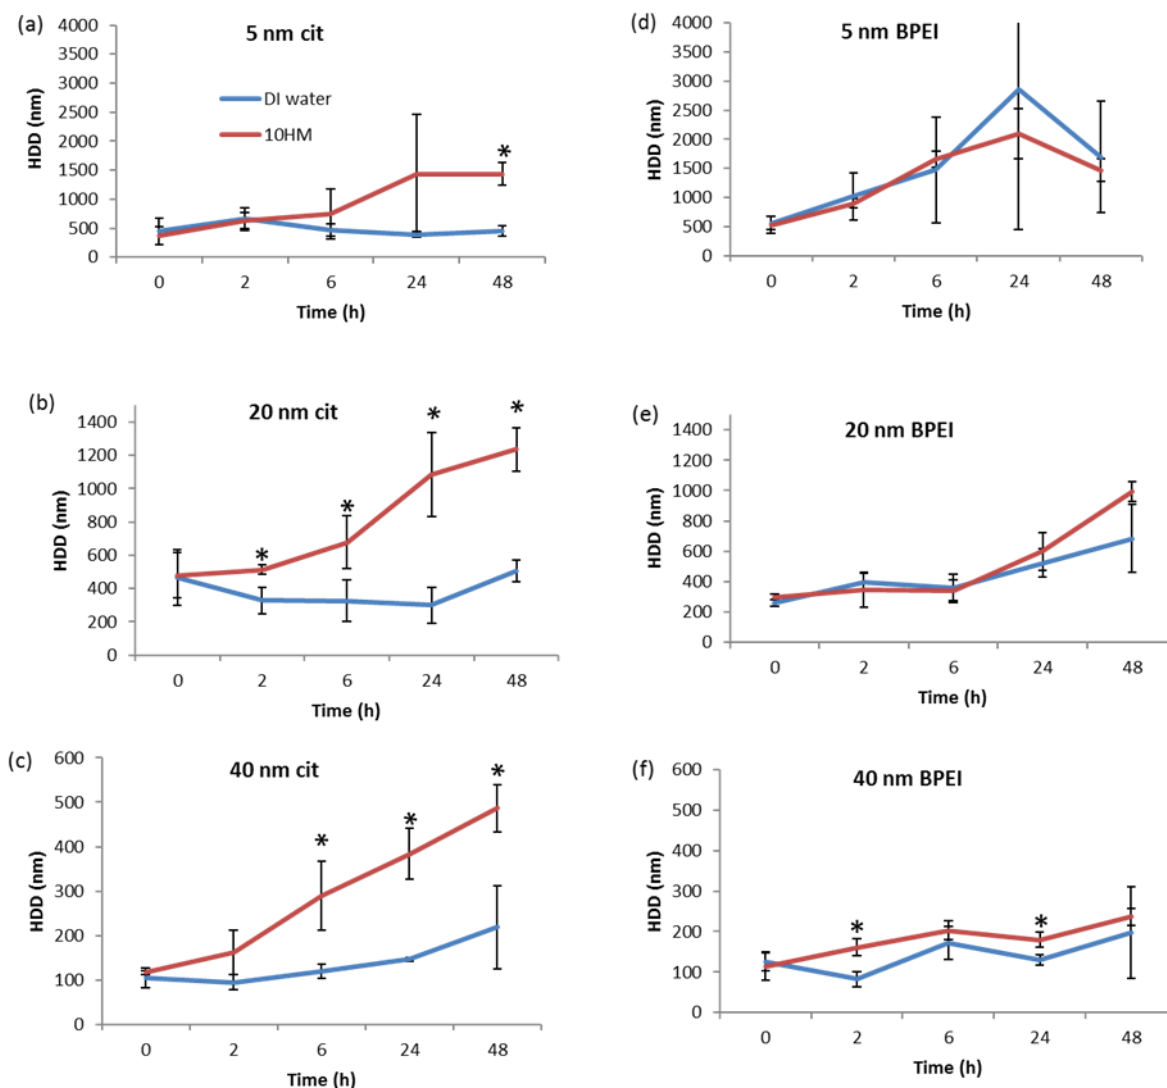

Figure S3: Hydrodynamic diameters of nAu in de-ionized water and 10% Hoagland's medium tracked using Dynamic Light Scattering technique over 48 h. (a) 5 nm Cit-nAu, (b) 20 nm Cit-nAu, (c) 40 nm Cit-nAu, (d) 5 nm BPEI-nAu, (e) 20 nm BPEI-nAu, and (f) 40 nm BPEI-nAu. Bars denote standard deviations, and statistical difference between the two media per time period is denoted by \* where  $n = 3$ .

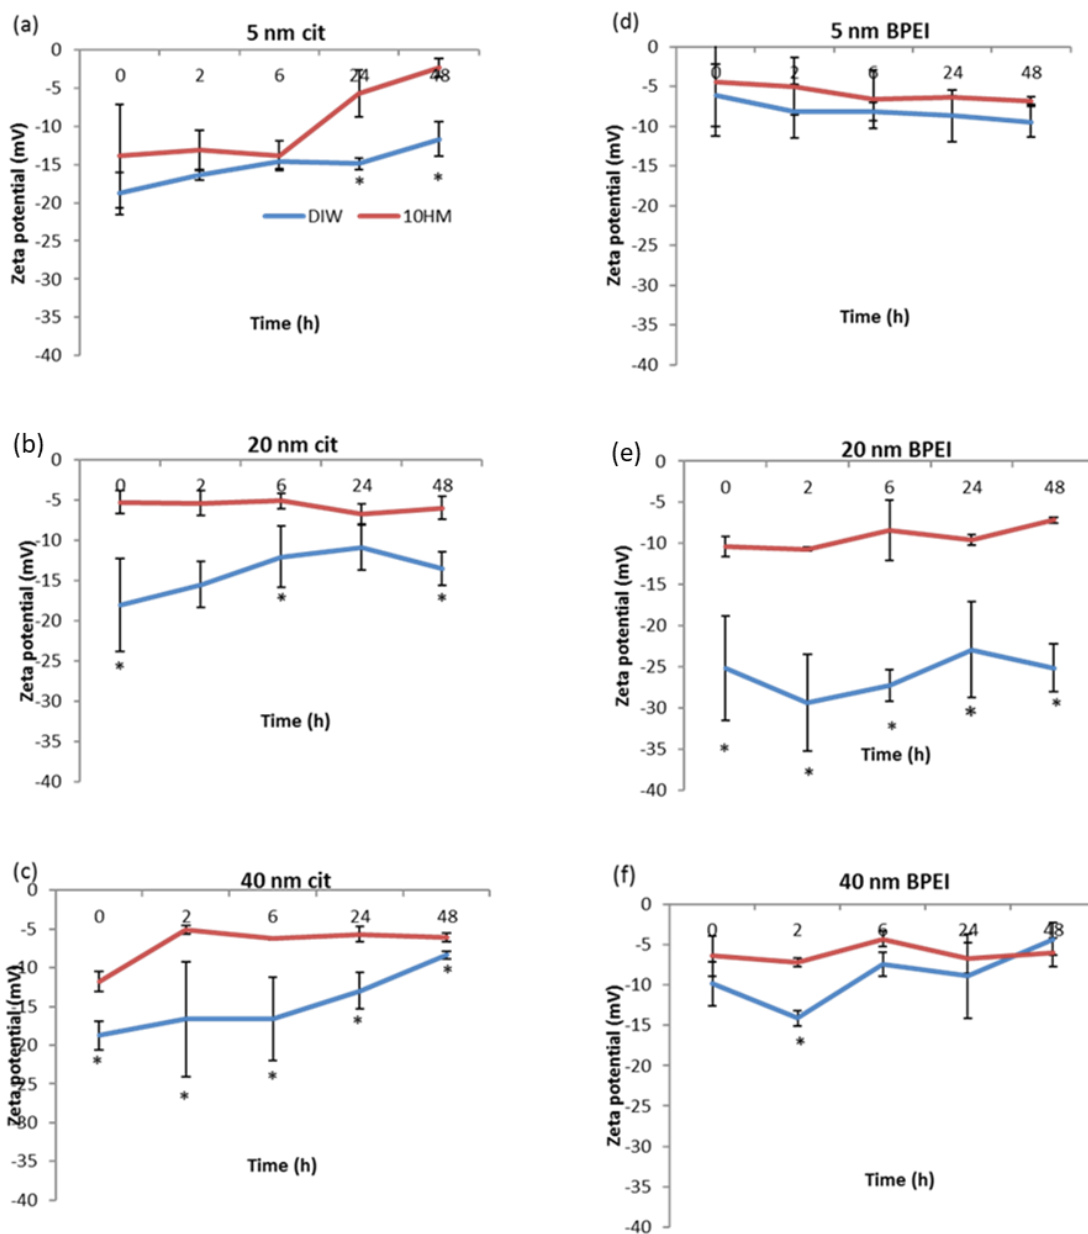

Figure S4: Zeta potentials of nAu in de-ionized water and 10% Hoagland's medium obtained using Dynamic Light Scattering technique over 48 h. (a) 5 nm Cit-nAu, (b) 20 nm Cit-nAu, (c) 40 nm Cit-nAu, (d) 5 nm BPEI-nAu, (e) 20 nm BPEI-nAu, and (f) 40 nm BPEI-nAu. Bars denote standard deviations, and statistical difference between the two media per time period is denoted by \* where  $n = 3$ .

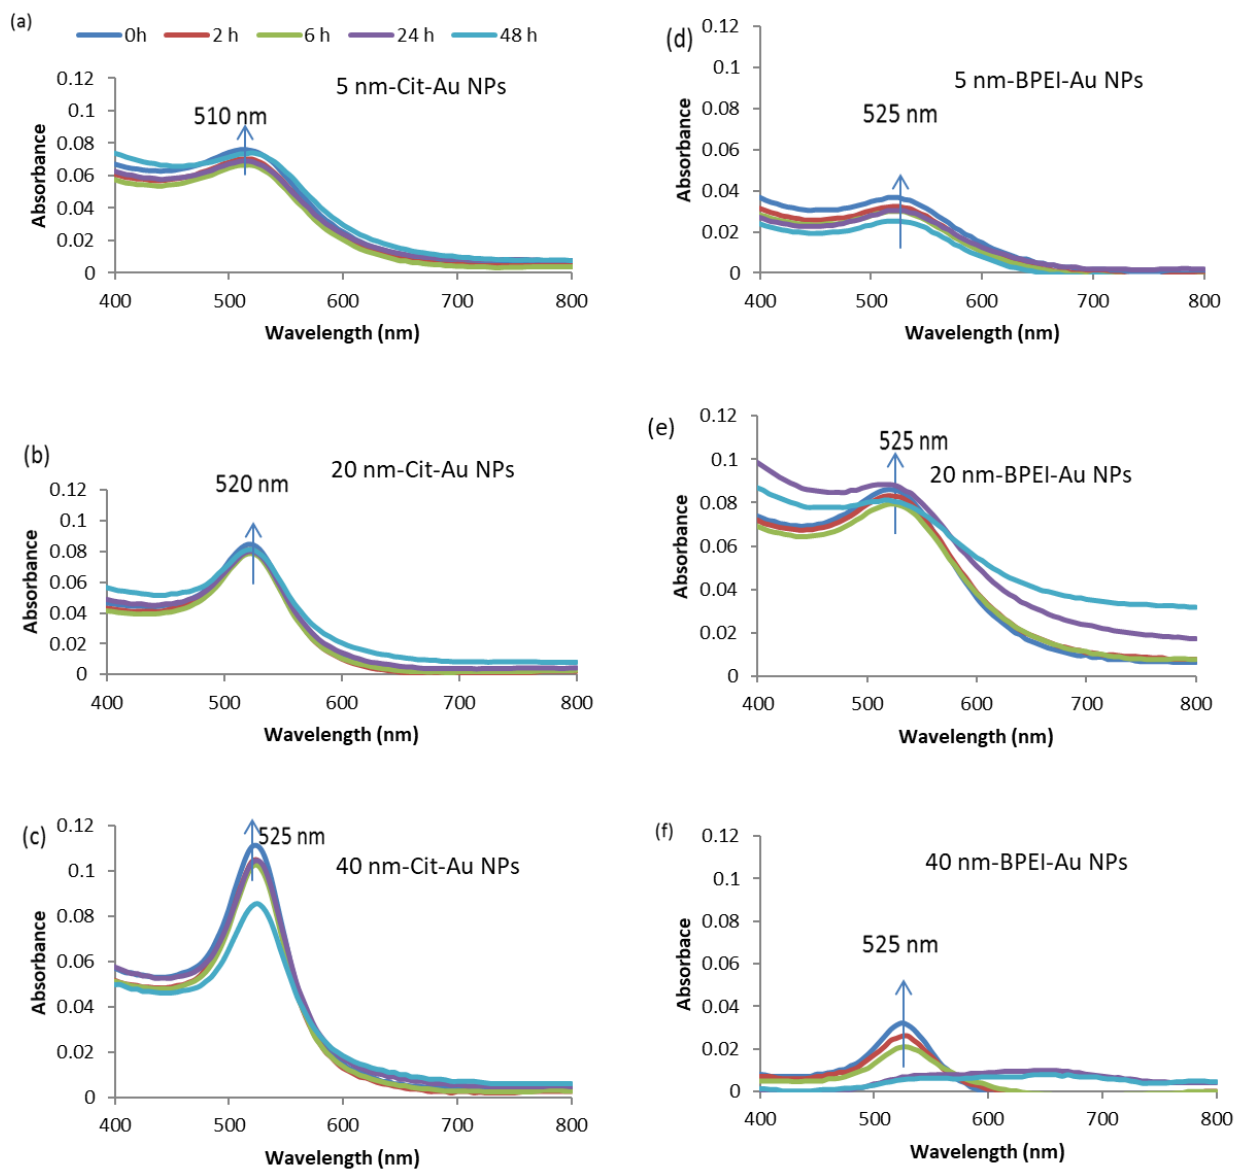

Figure S5: UV-vis spectrum of nAu in de-ionized water as a function of time. (a) 5 nm Cit-nAu, (b) 20 nm Cit-nAu, (c) 40 nm Cit-nAu, (d) 5 nm BPEI-nAu, (e) 20 nm BPEI-nAu, and (f) 40 nm BPEI-nAu. Data are presented as means ( $n = 3$ ). Arrows show the position of the main peak. Source: Mahaye [2].

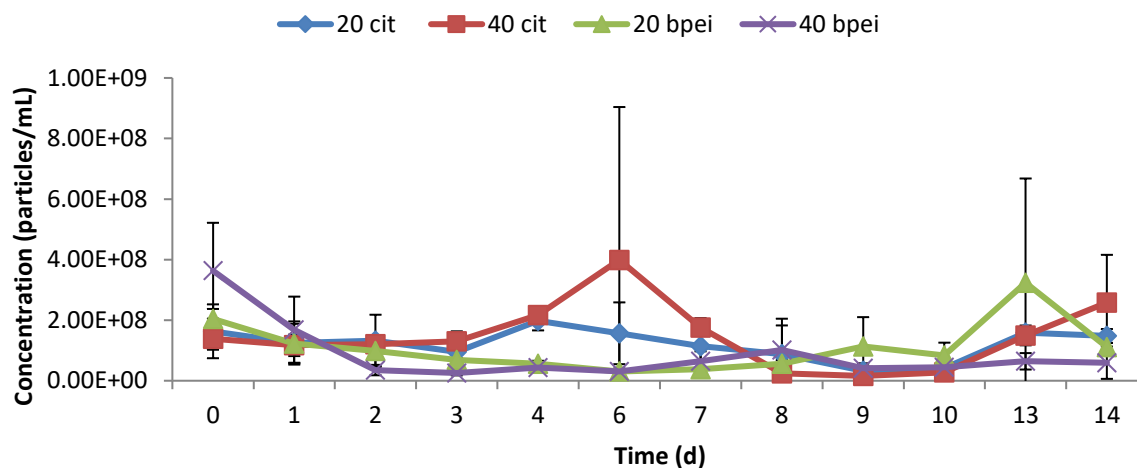

Figure S6: *in situ* nAu concentration (particles/mL) examined using Nanoparticle Tracking Analysis (NanoSight NS500, NTA 3.0 Software, Amesbury, UK). Results are represented as mean ( $n=3$ ) and bars denote standard deviation. The 5 nm sized-nAu samples were excluded from NTA analysis as the technique cannot measure sizes below 10 nm accurately (NanoSight NS500 operating manual, Version P553S).



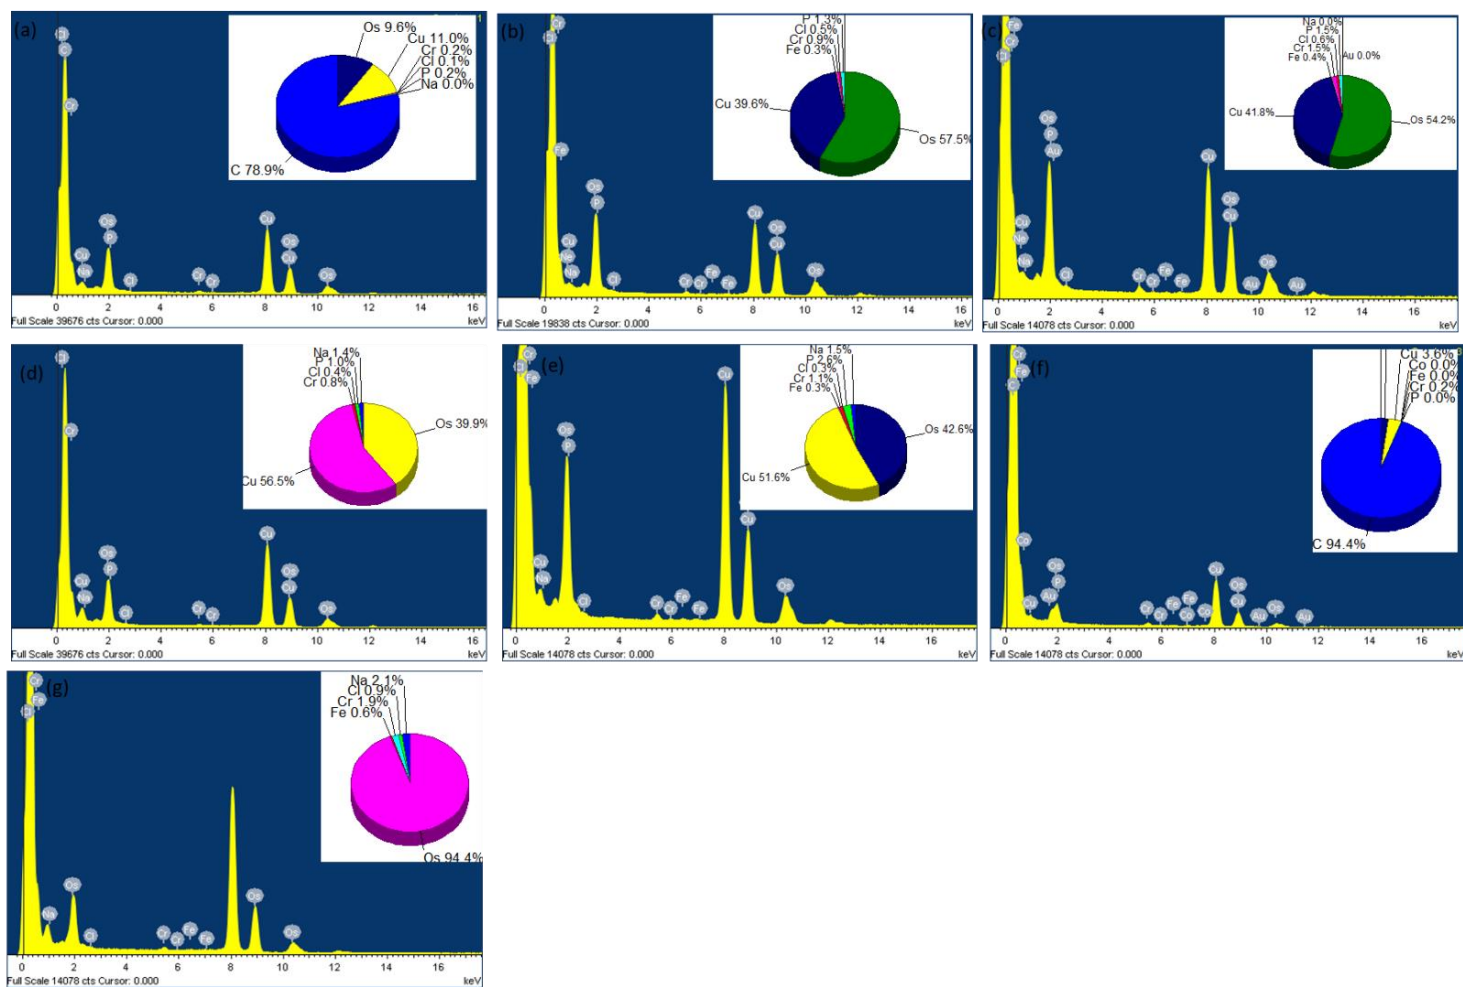

Figure S7: TEM-EDX spectra confirming the absence of nAu internalization on plant roots: (a) control, (b) 5 nm cit-nAu, (c) 20 nm-cit nAu, (d) 40 nm cit-nAu, (e) 5 nm BPEI-nAu, (f) 20 nm BPEI-nAu, and (g) 40 nm BPEI. Peaks indicate that only iron, copper, sodium, osmium, chromium, chlorine, and phosphorus were identified. The inserts on Figures indicate percentages of the detected elements.

## References

1. Hoagland DR; Arnon DI. The Water-Culture Method for Growing Plants without Soil. *California Agricultural Experiment Station Circular* **1950**, 347, 1–32.
2. Mahaye, N. Stability of Gold and Cerium Oxide Nanoparticles in Aqueous Environments, and Their Effects on *Pseudokirchneriella Subcapitata* and *Salvinia Minima*. PhD, University of Pretoria: Pretoria, **2019**. <https://repository.up.ac.za/handle/2263/72778>.
